# Supplementary material
Source: publisher figshare collection journal article supplement (https://gsapubs.figshare.com/ndownloader/files/22757177)
Supplement: Supplementary file 1 [file 22757177]

# Data Repository Item

## Part A: Database

| sample     | $d_g$ [ $\mu\text{m}$ ] |            | $d_p$<br>[ $\mu\text{m}$ ] | $f_p$<br>[fraction] | $Z=d_p/f_p$<br>[ $\mu\text{m}$ ] | $T$<br>[ $^{\circ}\text{C}$ ] |
|------------|-------------------------|------------|----------------------------|---------------------|----------------------------------|-------------------------------|
| Gs-126-a   | 10.6                    | $\pm$ 3.2  | 0.81                       | 0.065               | 13                               | 356                           |
| Gs-126-b   | 17.9                    | $\pm$ 7.0  | 1.31                       | 0.003               | 461                              | 356                           |
| Gs-126-c   | 11.8                    | $\pm$ 4.8  | 1.00                       | 0.039               | 26                               | 356                           |
| Gs-126-d   | 12.6                    | $\pm$ 4.7  | 0.75                       | 0.036               | 21                               | 356                           |
| Gs-126-e   | 11.2                    | $\pm$ 3.7  | 1.06                       | 0.061               | 17                               | 356                           |
| Gs-126-f   | 13.1                    | $\pm$ 5.1  | 0.64                       | 0.021               | 30                               | 356                           |
| Gs-126-h   | 18.1                    | $\pm$ 7.5  | 0.71                       | 0.001               | 550                              | 356                           |
| Gs-126-i   | 17.1                    | $\pm$ 5.7  | 3.45                       | 0.013               | 265                              | 356                           |
| Gs-126-k   | 16.3                    | $\pm$ 6.2  | 1.83                       | 0.033               | 55                               | 356                           |
| Gs-126-m   | 18.2                    | $\pm$ 6.6  | 2.90                       | 0.025               | 116                              | 356                           |
| Gs-126-n   | 16.7                    | $\pm$ 6.0  | 1.40                       | 0.012               | 117                              | 356                           |
|            |                         |            |                            |                     |                                  |                               |
| Do-28-a    | 12.2                    | $\pm$ 4.0  | 0.95                       | 0.076               | 12                               | 361                           |
| Do-28-b    | 14.0                    | $\pm$ 4.9  | 1.10                       | 0.076               | 15                               | 361                           |
| Do-28-c    | 22.4                    | $\pm$ 9.1  | 1.17                       | 0.010               | 113                              | 361                           |
| Do-28-d    | 20.7                    | $\pm$ 10.2 | 1.06                       | 0.004               | 281                              | 361                           |
| Do-28-e    | 18.8                    | $\pm$ 6.6  | 2.98                       | 0.061               | 49                               | 361                           |
| Do-28-g    | 22.8                    | $\pm$ 8.1  | 3.79                       | 0.006               | 632                              | 361                           |
|            |                         |            |                            |                     |                                  |                               |
| Do-24-a    | 25.6                    | $\pm$ 10.2 | 2.68                       | 0.020               | 134                              | 371                           |
| Do-24-b    | 26.8                    | $\pm$ 8.8  | 2.36                       | 0.011               | 215                              | 371                           |
| Do-24-c    | 20.2                    | $\pm$ 8.5  | 4.81                       | 0.133               | 36                               | 371                           |
| Do-24-d    | 26.3                    | $\pm$ 10.8 | 1.64                       | 0.029               | 56                               | 371                           |
| Do-24-e    | 20.6                    | $\pm$ 7.3  | 3.25                       | 0.086               | 37                               | 371                           |
| Do-24-f    | 22.5                    | $\pm$ 9.3  | 3.17                       | 0.074               | 43                               | 371                           |
| Do-24-g    | 27.2                    | $\pm$ 9.9  | 2.03                       | 0.004               | 508                              | 371                           |
| Do-24-h    | 28.4                    | $\pm$ 11.5 | 3.01                       | 0.010               | 301                              | 371                           |
| Do-24-i    | 21.0                    | $\pm$ 8.2  | 3.44                       | 0.075               | 46                               | 371                           |
| Do-24-m    | 22.2                    | $\pm$ 9.5  | 4.3                        | 0.126               | 34                               | 371                           |
| Do-24-n    | 24.9                    | $\pm$ 11.2 | 3.87                       | 0.076               | 51                               | 371                           |
| Do-24-o    | 21.6                    | $\pm$ 9.4  | 3.94                       | 0.097               | 41                               | 371                           |
| Do-24-p    | 23.8                    | $\pm$ 10.3 | 3.31                       | 0.057               | 58                               | 371                           |
|            |                         |            |                            |                     |                                  |                               |
| Jung-986-a | 29.4                    | $\pm$ 11.7 | 1.90                       | 0.060               | 31                               | 380                           |
| Jung-986-b | 27.0                    | $\pm$ 10.5 | 2.00                       | 0.085               | 24                               | 380                           |
| Jung-986-c | 27.1                    | $\pm$ 10.0 | 2.21                       | 0.069               | 32                               | 380                           |
| Jung-986-d | 19.7                    | $\pm$ 7.8  | 1.42                       | 0.077               | 19                               | 380                           |
| Jung-986-e | 29.0                    | $\pm$ 11.6 | 1.03                       | 0.025               | 42                               | 380                           |
| Jung-986-f | 39.0                    | $\pm$ 12.8 | 1.39                       | 0.011               | 131                              | 380                           |
| Jung-986-g | 40.6                    | $\pm$ 13.2 | 0.79                       | 0.002               | 337                              | 380                           |
| Jung-986-h | 31.4                    | $\pm$ 12.5 | 1.10                       | 0.031               | 36                               | 380                           |
| Jung-986-i | 40.2                    | $\pm$ 13.3 | 1.11                       | 0.007               | 151                              | 380                           |
| Jung-986-m | 37.4                    | $\pm$ 12.2 | 0.98                       | 0.011               | 89                               | 380                           |
| Jung-986-k | 39.7                    | $\pm$ 13.0 | 1.14                       | 0.011               | 104                              | 380                           |
| Jung-986-n | 37.0                    | $\pm$ 16.5 | 1.56                       | 0.008               | 195                              | 380                           |
| Jung-986-o | 34.3                    | $\pm$ 11.0 | 3.18                       | 0.038               | 84                               | 380                           |

Table DR1: Database for Figure 2 presenting microstructural parameters of carbonate mylonites with variable second-phase contents. Note that sheet silicates are the predominating second-phase in these samples.  $d_g$ : calcite grain size,  $d_p$ : second phase grain size,  $f_p$ : second phase volume fraction,  $Z$ : Zener parameter =  $d_p/f_p$ ,  $T$ : temperature.

## Part B: Equation derivations

### Temperature-dependent Zener relation

$$d_g = c \cdot Z^m, \text{ where } Z = \left( \frac{d_p}{f_p} \right) \quad \text{eq. 2}$$

Eq. 2 relates  $Z$  [ $\mu\text{m}$ ], as ratio of the grain size  $d_p$  [ $\mu\text{m}$ ] and the volume fraction of the second-phases  $f_p$ , in dependence of a dimensionless exponent  $m$  and a constant  $c$  [ $\mu\text{m}^{1-m}$ ] to the size of the matrix grains  $d_g$  [ $\mu\text{m}$ ]. This equation is valid only for isothermal conditions but a temperature-dependence can be incorporated in the following form:

$$d_g = c' \cdot \exp(-Q_g / RT) \cdot Z^m \quad \text{eq. 3}$$

where  $Q_g$  [ $\text{J mol}^{-1}$ ] is the activation energy for growth of the matrix grain and  $c'$  [ $\mu\text{m}^{1-m}$ ] is a constant,  $R$  is the gas constant and  $T$  is the temperature.

### Calculation of the activation energy $Q_g$ and the constant $c'$

#### *The basic equation*

In order to reduce first the dimensions in eq. 3, both sides of the equation are divided by [ $\mu\text{m}$ ]. Then the logarithm is taken.

$$\log(d_g) = \log(c') + m \cdot \log(Z) + (-Q_g / RT) \cdot \log(e) \quad \text{eq. 3.1}$$

For a specific  $Z$  value, the terms  $\log(c')$  and  $m \cdot \log(Z)$  are constant and can therefore be replaced by  $c'' = \log(c') + m \cdot \log(Z)$ , yielding in:

$$\log(d_g) = c'' + (-Q_g / R) \cdot \log(e) \cdot 1/T \quad \text{eq. 3.2}$$

Taking a series of  $d_g$  values for different  $T$  but constant  $Z$  and plotting them in a  $\log(d_g)$  versus  $1/T$  diagram, the slope  $s_l$  of the resulting linear trend corresponds to  $(-Q_g/R) \cdot \log(e)$ . Hence,  $Q_g$  can be calculated by eq. 3.3

$$Q_g = (s_l \cdot R) / \log(e) \quad \text{eq. 3.3}$$

Finally,  $c'$  can be calculated by solving eq. 3:

$$c' = d_g / (Z^m \cdot \exp(-Q_g / RT)) \quad \text{eq. 3.4}$$

## Second-phase grain growth

### *The basic equation*

The data obtained from field samples subjected to different deformation temperatures suggest a power law relationship between  $d_p$  and  $f_p$

$$d_p = k \cdot f_p^n \quad \text{eq. 4}$$

with a dimensionless and constant exponent  $n$  and a constant  $k$  [ $\mu\text{m}$ ]. Since second-phase coarsening is temperature dependent, an activation energy term can be added in the same manner as already done for eq. 3.

$$d_p = k' \cdot \exp(-Q_p / RT) \cdot f_p^n \quad \text{eq. 5}$$

where  $k'$  [ $\mu\text{m}$ ] is a constant and  $Q_p$  [ $\text{J mol}^{-1}$ ] the activation energy for second-phase growth.

*Calculation of the activation energy  $Q_p$  and the constant  $k'$*

To calculate  $Q_p$ , both sides of eq. 5 are divided in a first step by [ $\mu\text{m}$ ] to eliminate the units and the logarithm is taken.

$$\log(d_p) = \log(k') + n \cdot \log(f_p) + (-Q_p / R) \cdot \log(e) \cdot (1/T) \quad \text{eq. 5.1}$$

For a series of data with constant  $f_p$  but different  $T$  and  $d_p$ , the term  $\log(k') + n \cdot \log(f_p)$  is constant and can be replaced by  $k''$ :

$$\log(d_p) = k'' + (-Q_p / R) \cdot \log(e) \cdot (1/T) \quad \text{eq. 5.2}$$

Hence, in a graph  $\log(d_p)$  versus  $1/T$ , the slope  $s_2$  corresponds to  $(-Q_p/R) \cdot \log(e)$  allowing the calculation of  $Q_p$ . Using the new  $Q_p$ , eq. 5 can be solved for  $k'$ .

### The final equation

The variable  $d_p$ , which is incorporated in the  $Z$  term of eq. 3, can now be replaced by eq. 5 resulting in:

$$d_g = c' \cdot \exp(-Q_g/RT) \cdot \left( \frac{d_p}{f_p} \right)^m = c' \cdot \exp(-Q_g/RT) \cdot \left( \frac{(k' \cdot \exp(-Q_p/RT) \cdot f_p^n)}{f_p} \right)^m$$

which finally yields in:

$$d_g = c' \cdot k'^m \cdot \exp(-Q_g/RT) \cdot \left( \exp(-Q_p/RT) \right)^m \cdot f_p^{m(n-1)} \quad \text{eq. 6}$$

Eq. 6 shows that  $d_g$  basically depends on four parameters: (1) the constants  $c'$  and  $k'$ , (2) & 3) activation terms for growth of the matrix grain and growth of the second-phase and (4) the volume fraction of the second-phases.

### The role of the pre-exponential constants

Normal grain growth for monomineralic aggregates is classically defined by:

$$d_g^n - d_{g0}^n = k \cdot \exp(-Q/RT) \cdot (t - t_0) \quad \text{eq. 1}$$

where  $d_g$  and  $d_{g0}$  are the final and starting grain size, respectively,  $n$  is the growth exponent,  $k$  a pre-exponential constant,  $Q$  an activation energy,  $R$  the gas constant,  $T$  the

temperature and  $(t-t_0)$  the time interval during which grain growth occurred. Here, the pre-exponential parameter  $k$  can be subdivided into:

$$k = C' \frac{\Omega D_{gb}}{\delta k_{BZ} T} \gamma \quad \text{eq. 1.1}$$

indicating that normal grain growth also depends on parameters like a constant  $C'$ , the unit cell volume  $\Omega$ , the grain boundary diffusion coefficient  $D_{gb}$ , the grain boundary width  $\delta$ , the Boltzman factor  $k_{BZ}T$  and the interface specific Gibbs free energy  $\gamma$  (see also Evans et al., 2001).

Similar to the pre-exponential constant of eqs. 1 and 1.1, eq. 6 could additionally be used to obtain information about mass transfer in case of two-phase systems (e.g. calcite – muscovite). Here, the constants  $k'$  and  $c'$  also comprise information with respect to mass transfer coefficients. In comparison with eq. 1.1, the parameters  $C'$ ,  $\Omega$ ,  $\delta$ ,  $k_{BZ}$  and  $\gamma$  will be nearly constant for both  $k'$  and  $c'$ , i.e. for calcite and the second phases, respectively. The only parameter variable for different geologic environments will be the mass transfer coefficient. In this way, mass transfer coefficients for second-phase minerals can be investigated for polymineralic aggregates undergoing coarsening via dissolution - mass transfer - precipitation cycles. Since, mass transfer is drastically enhanced under wet conditions, the mass transfer coefficient may deliver additional information about the fluid activity in such systems. This information is crucial for comparison of identical polymineralic rock types from different geological environments to learn more in a quantitative way about the processes associated with the microstructural evolution.
